# Supplementary material for: Omega-3 Fatty Acid Intake during Pregnancy and Child Neuropsychological Development: A Multi-Centre Population-Based Birth Cohort Study in Spain
Source: MDPI journal article supplement (doi:10.3390/nu14030518), 2022-01-25
Supplement: s1 [file s1]

## Supplementary Material

**Supplementary Figure S1.** Directed Acyclic Graph (DAG) for investigating causal pathways between Child Neuropsychological Outcome and Maternal Dietary omega-3 intake during pregnancy.

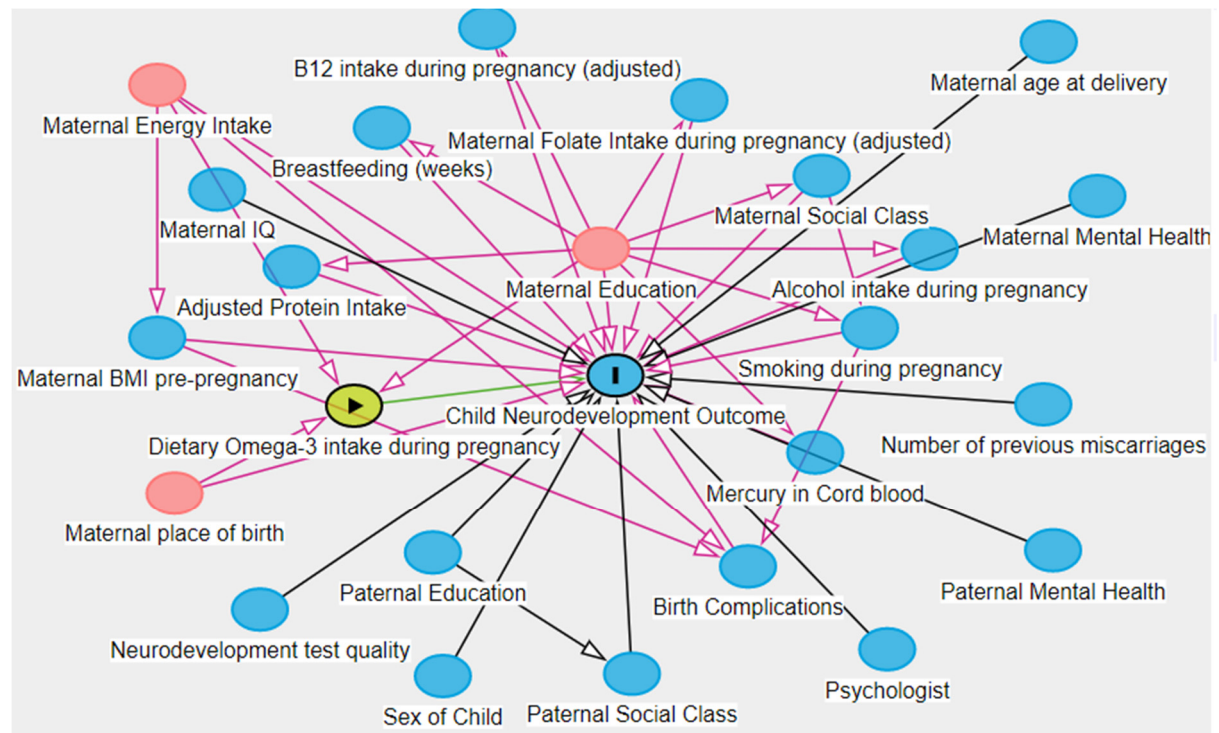

**Supplementary Table S1.** Extended Baseline Characteristics of the study participants according to the quartiles of dietary omega-3 fatty acids Consumption in the First Trimester of Pregnancy.

|                                                                         | Quartiles of Dietary Omega <sup>b</sup> 3 Intake at 1st Trimester <sup>*</sup> |                           |                           |                           | p values |
|-------------------------------------------------------------------------|--------------------------------------------------------------------------------|---------------------------|---------------------------|---------------------------|----------|
|                                                                         | 1<br>(n=645) <sup>a</sup>                                                      | 2<br>(n=645) <sup>a</sup> | 3<br>(n=645) <sup>a</sup> | 4<br>(n=647) <sup>a</sup> |          |
| Father Education Level, n (%)                                           |                                                                                |                           |                           | 0.535                     |          |
| Primary or Less                                                         | 240 (37.68)                                                                    | 217 (33.85)               | 235 (36.60)               | 226 (35.15)               |          |
| Secondary School                                                        | 271 (42.54)                                                                    | 275 (42.90)               | 277 (43.15)               | 292 (45.41)               |          |
| University or More                                                      | 126 (19.78)                                                                    | 149 (23.24)               | 130 (20.25)               | 125 (19.44)               |          |
| Social Class of Father, n (%)                                           |                                                                                |                           |                           |                           | 0.106    |
| Highly Skilled                                                          | 120 (19.17)                                                                    | 145 (22.83)               | 121 (18.94)               | 111 (17.82)               |          |
| Non-Manual                                                              | 92 (14.70)                                                                     | 104 (16.38)               | 118 (18.47)               | 119 (19.10)               |          |
| Manual                                                                  | 414 (66.13)                                                                    | 386 (60.79)               | 400 (62.60)               | 393 (63.08)               |          |
| Living situation , n (%)                                                |                                                                                |                           |                           |                           | 0.821    |
| Live with father's child                                                | 630 (97.67)                                                                    | 632 (97.98)               | 636 (98.15)               | 641 (99.07)               |          |
| Live with partner.                                                      | 1 (0.16)                                                                       | 1 (0.15)                  | 1 (0.15)                  | 0 (0)                     |          |
| Live with her parents                                                   | 11 (1.71)                                                                      | 9 (1.40)                  | 7 (1.08)                  | 5 (0.77)                  |          |
| Live Alone                                                              | 1 (0.16)                                                                       | 2 (0.31)                  | 3 (0.46)                  | 0 (0)                     |          |
| Others                                                                  | 2 (0.31)                                                                       | 1 (0.16)                  | 1 (0.15)                  | 1 (0.15)                  |          |
| Mental Health of Mother <sup>c</sup> , n (%)                            |                                                                                |                           |                           |                           | 0.657    |
| <42                                                                     | 82 (25.79)                                                                     | 73 (21.41)                | 98 (26.42)                | 90 (26.01)                |          |
| 42-48                                                                   | 80 (25.16)                                                                     | 102 (29.91)               | 85 (22.91)                | 82 (23.70)                |          |
| 48-56                                                                   | 76 (23.90)                                                                     | 84 (24.63)                | 92 (24.80)                | 83 (23.99)                |          |
| >56                                                                     | 80 (25.16)                                                                     | 82 (24.05)                | 96 (25.88)                | 91 (26.30)                |          |
| Mental Health of Father <sup>c</sup> , n (%)                            |                                                                                |                           |                           |                           | 0.355    |
| <42                                                                     | 92 (24.47)                                                                     | 76 (19.14)                | 101 (23.60)               | 112 (25.87)               |          |
| 42-48                                                                   | 89 (23.67)                                                                     | 112 (28.21)               | 119 (27.80)               | 121 (27.94)               |          |
| 48-55                                                                   | 88 (23.40)                                                                     | 96 (24.18)                | 103 (24.07)               | 99 (22.86)                |          |
| >55                                                                     | 107 (28.46)                                                                    | 113 (28.46)               | 105 (24.53)               | 101 (23.33)               |          |
| Maternal IQ , mean (SD)                                                 | 9.81 (3.02)                                                                    | 9.86 (2.98)               | 10.13 (3.08)              | 9.95 (2.79)               | 0.417    |
| Paternal IQ , mean (SD)                                                 | 9.56 (2.96)                                                                    | 9.75 (3.09)               | 9.97 (3.01)               | 10.02 (2.75)              | 0.721    |
| Paternal smoking in presence of child <sup>d</sup> , n (%)              |                                                                                |                           |                           |                           | 0.417    |
| Yes                                                                     | 29 (14.15)                                                                     | 34 (17.26)                | 26 (11.93)                | 27 (12.68)                |          |
| No                                                                      | 176 (85.85)                                                                    | 163 (82.74)               | 192 (88.07)               | 186 (87.32)               |          |
| Protein Intake (g/day) <sup>b</sup> , mean (SD)                         | 89.33 (12.65)                                                                  | 93.14 (11.88)             | 96.48 (11.67)             | 102.24 (14.57)            | 0.001    |
| B12 intake (mg/day) <sup>b</sup> , mean (SD)                            | 18.53 (167.37)                                                                 | 15.00 (63.80)             | 10.75 (18.18)             | 18.14 (74.81)             | 0.448    |
| Iron intake (mg/day) <sup>b</sup> , mean (SD)                           | 16.48 (12.97)                                                                  | 16.56 (12.44)             | 15.97 (12.17)             | 16.18 (10.33)             | 0.802    |
| Folate intake (mg/day) <sup>b</sup> , mean (SD)                         | 1953.46 (2647.17)                                                              | 1935.31 (2644.05)         | 2116.75 (2718.40)         | 2181.06 (2842.70)         | 0.277    |
| Omega-6 intake (g/day) <sup>b</sup> , mean (SD)                         | 11.75 (3.47)                                                                   | 12.30 (3.01)              | 12.79 (3.01)              | 13.39 (3.33)              | 0.001    |
| Dietary Omega-6 /-3 ratio <sup>b</sup> , mean (SD)                      | 10.62 (3.33)                                                                   | 9.11 (2.20)               | 8.31 (1.92)               | 6.96 (1.86)               | 0.001    |
| DHA intake (g/day) <sup>b</sup> , mean (SD)                             | 0.12 (0.06)                                                                    | 0.19 (0.07)               | 0.26 (0.09)               | 0.43 (0.21)               | 0.001    |
| Omega-3 supplementation during pregnancy, n (%)                         |                                                                                |                           |                           |                           | 0.349    |
| No                                                                      | 619 (95.97)                                                                    | 609 (94.42)               | 618 (95.37)               | 608 (93.97)               |          |
| Yes                                                                     | 26 (4.03)                                                                      | 36 (5.58)                 | 30 (4.63)                 | 39 (6.03)                 |          |
| Dietary + Supplementation Omega 3 intake mean (SD) (g/day) <sup>b</sup> | 3.399 (17.98)                                                                  | 4.58 (16.91)              | 4.44 (19.29)              | 5.44 (19.02)              | 0.258    |
| aMED Score , mean (SD)                                                  | 3.48 (1.45)                                                                    | 3.81 (1.57)               | 4.08 (1.67)               | 4.22 (1.50)               | 0.001    |

|                                             |             |              |              |              |       |
|---------------------------------------------|-------------|--------------|--------------|--------------|-------|
| Preterm                                     |             |              |              |              | 0.836 |
| Yes                                         | 32 (5.24)   | 26 (4.25)    | 27 (4.33)    | 29 (4.73)    |       |
| No                                          | 579 (94.76) | 586 (95.75)  | 597 (95.67)  | 584 (95.27)  |       |
| Country of birth of mother, n (%)           |             |              |              |              | 0.001 |
| Spain                                       | 550 (85.27) | 588 (91.30)  | 614 (94.75)  | 612 (94.88)  |       |
| Other                                       | 95 (14.73)  | 56 (8.70)    | 34 (5.25)    | 33 (5.12)    |       |
| Cohort Location, n (%)                      |             |              |              |              | 0.001 |
| Asturias                                    | 103 (15.97) | 95 (14.73)   | 115 (17.75)  | 169 (26.12)  |       |
| Gipuzkoa                                    | 183 (28.37) | 170 (26.36)  | 155 (23.92)  | 119 (18.39)  |       |
| Sabadell                                    | 123 (19.07) | 149 (23.10)  | 187 (28.86)  | 195 (30.14)  |       |
| Valencia                                    | 236 (36.59) | 231 (35.81)  | 191 (29.48)  | 164 (25.35)  |       |
| Mercury in Cord blood (µg/L), mean (SD)     | 8.86 (6.81) | 11.06 (9.42) | 11.62 (9.77) | 12.31 (9.12) | 0.001 |
| Omega 3 % in cord blood                     |             |              |              |              |       |
| ALA in %, mean (SD)                         | 0.09 (0.07) | 0.11 (0.11)  | 0.11 (0.12)  | 0.10 (0.09)  | 0.256 |
| EPA in %, mean (SD)                         | 0.23 (0.19) | 0.23 (0.17)  | 0.24 (0.20)  | 0.23 (0.15)  | 0.993 |
| DHA in %, mean (SD)                         | 5.10 (1.72) | 5.15 (1.65)  | 5.05 (1.59)  | 5.14 (1.70)  | 0.915 |
| <b>Child Characteristics</b>                |             |              |              |              |       |
| Omega 3 intake at 4 year of age , mean (SD) | 0.96 (0.21) | 1.01 (0.21)  | 1.03 (0.20)  | 1.05 (0.21)  | 0.000 |
| Low birthweight, n (%)                      |             |              |              |              |       |
| 0.347                                       |             |              |              |              |       |
| Yes                                         | 582 (95.10) | 585 (95.12)  | 584 (93.59)  | 590 (95.78)  |       |
| No                                          | 30 (4.90)   | 30 (4.88)    | 40 (6.41)    | 26 (4.22)    |       |

\*1<sup>st</sup> quartile: <1.262g/day. 2<sup>nd</sup> quartile: 1.262g-1.440g/day. 3<sup>rd</sup> quartile: 1.440g-1.657g/day. 4<sup>th</sup> quartile: >1.657g/day

<sup>a</sup> Some categories may be missing values so therefore totals may not match total number of subjects

<sup>b</sup> Adjusted for energy intake

<sup>c</sup> Global Severity Index the Symptom Checklist-90-R, T Score

<sup>d</sup> Yes = "often"+"sometimes". No = "no"+"hardley ever"

**Supplementary Table S2 .** Baseline Characteristics of the study participants according to the quartiles of dietary omega-3 fatty acids Consumption in the 3<sup>rd</sup> Trimester of Pregnancy.

|                                                            | Quartiles of Dietary Omega-3 <sup>b</sup> Intake at 3 <sup>rd</sup> Trimester* |                           |                           |                           | p values |
|------------------------------------------------------------|--------------------------------------------------------------------------------|---------------------------|---------------------------|---------------------------|----------|
|                                                            | 1<br>(n=612) <sup>a</sup>                                                      | 2<br>(n=610) <sup>a</sup> | 3<br>(n=611) <sup>a</sup> | 4<br>(n=610) <sup>a</sup> |          |
| Age (years) <sup>c</sup> , mean (SD)                       | 31.36 (4.53)                                                                   | 31.89 (4.16)              | 32.19 (4.19)              | 32.35 (4.00)              | 0.001    |
| Mother Education Level, n (%)                              |                                                                                |                           |                           |                           | 0.001    |
| Primary or Less                                            | 186 (30.44)                                                                    | 134 (22.00)               | 147 (24.14)               | 125 (20.49)               |          |
| Secondary School                                           | 237 (38.79)                                                                    | 246 (40.39)               | 241 (29.57)               | 289 (47.38)               |          |
| University or More                                         | 188 (30.77)                                                                    | 229 (37.60)               | 221 (36.29)               | 196 (32.13)               |          |
| Father Education Level, n (%)                              |                                                                                |                           |                           |                           | 0.005    |
| Primary or Less                                            | 252 (41.65)                                                                    | 192 (31.79)               | 209 (34.60)               | 203 (33.28)               |          |
| Secondary School                                           | 228 (37.69)                                                                    | 281 (46.52)               | 279 (46.19)               | 284 (46.56)               |          |
| University or More                                         | 125 (20.66)                                                                    | 131 (21.69)               | 116 (19.21)               | 123 (20.16)               |          |
| Social Class of Mother, n (%)                              |                                                                                |                           |                           | 0.000                     |          |
| Highly Skilled                                             | 112 (18.33)                                                                    | 147 (24.10)               | 156 (25.53)               | 109 (17.87)               |          |
| Non-Manual                                                 | 145 (23.73)                                                                    | 160 (26.23)               | 145 (23.73)               | 187 (20.66)               |          |
| Manual                                                     | 354 (57.94)                                                                    | 303 (49.67)               | 310 (50.74)               | 314 (51.48)               |          |
| Social Class of Father, n (%)                              |                                                                                |                           |                           |                           | 0.215    |
| Highly Skilled                                             | 106 (17.79)                                                                    | 134 (22.60)               | 119 (19.73)               | 114 (19.32)               |          |
| Non-Manual                                                 | 99 (16.61)                                                                     | 95 (16.02)                | 101 (16.75)               | 118 (20.00)               |          |
| Manual                                                     | 391 (65.90)                                                                    | 364 (61.38)               | 383 (63.52)               | 358 (60.68)               |          |
| Living situation , n (%)                                   |                                                                                |                           |                           |                           | 0.288    |
| Live with father's child                                   | 598 (97.71)                                                                    | 599 (98.20)               | 598 (98.03)               | 604 (99.02)               |          |
| Live with partner                                          | 1 (0.16)                                                                       | 1 (0.16)                  | 1 (0.16)                  | 0 (0.00)                  |          |
| Live with her parents                                      | 9 (1.47)                                                                       | 9 (1.48)                  | 5 (0.82)                  | 6 (0.98)                  |          |
| Live Alone                                                 | 1 (0.16)                                                                       | 1 (0.16)                  | 4 (0.66)                  | 0 (0.00)                  |          |
| Others                                                     | 3 (0.49)                                                                       | 0 (0.00)                  | 2 (0.33)                  | 0 (0.00)                  |          |
| Mental Health of Mother <sup>d</sup> , n (%)               |                                                                                |                           |                           |                           | 0.970    |
| <42                                                        | 82 (25.62)                                                                     | 87 (25.44)                | 77 (22.71)                | 95 (26.32)                |          |
| 42-48                                                      | 87 (27.19)                                                                     | 83 (24.27)                | 86 (25.37)                | 87 (24.10)                |          |
| 48-56                                                      | 75 (23.44)                                                                     | 83 (24.27)                | 83 (24.48)                | 88 (24.38)                |          |
| >56                                                        | 76 (23.75)                                                                     | 89 (26.02)                | 93 (27.43)                | 91 (25.21)                |          |
| Mental Health of Father <sup>d</sup> , n (%)               |                                                                                |                           |                           |                           | 0.782    |
| <42                                                        | 84 (22.22)                                                                     | 93 (23.85)                | 94 (23.15)                | 103 (23.57)               |          |
| 42-48                                                      | 104 (27.51)                                                                    | 103 (26.41)               | 102 (25.12)               | 125 (28.60)               |          |
| 48-55                                                      | 82 (21.69)                                                                     | 92 (23.59)                | 98 (24.14)                | 110 (25.17)               |          |
| >55                                                        | 108 (28.57)                                                                    | 102 (26.15)               | 112 (27.59)               | 99 (22.65)                |          |
| Maternal IQ , mean (SD)                                    | 9.58 (3.04)                                                                    | 10.24 (3.10)              | 10.08 (2.85)              | 9.88 (2.84)               | 0.009    |
| Paternal IQ , mean (SD)                                    | 9.98 (3.04)                                                                    | 9.78 (2.60)               | 9.67 (3.26)               | 9.87 (2.84)               | 0.907    |
| Smoking during pregnancy, n (%)                            |                                                                                |                           |                           |                           | 0.247    |
| Yes                                                        | 115 (18.82)                                                                    | 98 (16.12)                | 91 (14.92)                | 110 (18.06)               |          |
| No                                                         | 496 (81.18)                                                                    | 510 (83.88)               | 519 (85.08)               | 499 (81.94)               |          |
| Paternal smoking in presence of child <sup>c</sup> , n (%) |                                                                                |                           |                           |                           | 0.247    |
| Yes                                                        | 26 (13.20)                                                                     | 34 (16.83)                | 35 (15.70)                | 21 (10.40)                |          |
| No                                                         | 171 (86.80)                                                                    | 168 (83.17)               | 188 (84.30)               | 181 (89.60)               |          |
| Alcohol Consumption during Third Trimester, n (%)          |                                                                                |                           |                           |                           | 0.009    |
| Yes                                                        | 415 (67.81)                                                                    | 369 (60.49)               | 369 (60.39)               | 363 (59.51)               |          |
| No                                                         | 197 (32.19)                                                                    | 241 (39.51)               | 242 (39.61)               | 247 (40.49)               |          |
| Energy intake (kcal/day), mean (SD)                        | 2083.84 (568.14)                                                               | 2069.14 (522.04)          | 2091.94 (550.49)          | 2065.92 (557.35)          | 0.822    |
| Protein Intake (g/day) <sup>b</sup> , mean (SD)            | 89.21 (12.23)                                                                  | 92.07 (11.93)             | 95.44 (12.24)             | 101.46 (13.99)            | 0.000    |
| B12 intake (mg/day) <sup>b</sup> ,                         | 16.66                                                                          | 15.97                     | 18.50                     | 20.45                     | 0.738    |

|                                                                                |                      |                      |                      |                      |       |
|--------------------------------------------------------------------------------|----------------------|----------------------|----------------------|----------------------|-------|
| mean (SD)                                                                      | (74.76)              | (67.51)              | (78.09)              | (85.18)              |       |
| Iron intake (mg/day) <sup>b</sup> ,<br>0.455 mean (SD)                         | 32.29<br>(29.05)     | 31.43<br>(30.01)     | 30.00<br>(28.97)     | 32.36<br>(28.43)     |       |
| Folate intake (mg/day) <sup>b</sup> ,<br>mean (SD)                             | 1813.56<br>(2890.11) | 1652.19<br>(2696.95) | 1575.29<br>(2563.99) | 1954.52<br>(3041.79) | 0.083 |
| Omega-6 intake (g/day) <sup>b</sup> ,<br>mean (SD)                             | 11.14<br>(3.44)      | 11.82<br>(3.31)      | 11.96<br>(2.57)      | 12.50<br>(3.02)      | 0.001 |
| Dietary Omega-6 /-3 ratio <sup>b</sup> ,<br>mean (SD)                          | 10.39<br>(3.59)      | 9.01<br>(2.57)       | 8.00<br>(1.71)       | 6.74<br>(1.66)       | 0.001 |
| DHA intake (grams) <sup>b</sup> ,<br>mean (SD)                                 | 0.13<br>(0.06)       | 0.19<br>(0.07)       | 0.26<br>(0.09)       | 0.43<br>(0.20)       | 0.001 |
| Omega-3 supplementation<br>during Pregnancy, n (%)                             |                      |                      |                      |                      | 0.312 |
| Yes                                                                            | 23 (3.76)            | 31 (5.08)            | 36 (5.89)            | 35 (5.74)            |       |
| No                                                                             | 589 (96.24)          | 579 (94.92)          | 575 (94.11)          | 575 (94.26)          |       |
| Dietary + Supplementation<br>Omega 3 intake (g/day),<br>mean (SD) <sup>b</sup> | 13.81 (57.49)        | 13.35 (53.17)        | 12.36 (46.05)        | 13.52 (48.34)        | 0.965 |
| aMED Score , mean (SD)                                                         | 3.47 (1.45)          | 3.75 (1.51)          | 3.97 (1.61)          | 4.16 (1.51)          | 0.001 |
| Preterm, n (%)                                                                 |                      |                      |                      |                      | 0.287 |
| Yes                                                                            | 31 (5.15)            | 21 (3.51)            | 21 (3.52)            | 22 (2.64)            |       |
| No                                                                             | 571 (94.85)          | 578 (96.49)          | 575 (96.48)          | 583 (96.36)          |       |
| Mother BMI pre-pregnancy,<br>mean (SD)                                         | 23.52 (4.57)         | 23.35 (4.15)         | 23.69 (4.19)         | 23.70 (4.36)         | 0.450 |
| Number of previous miscarriages , n (%)                                        |                      |                      |                      |                      | 0.198 |
| 0                                                                              | 462 (75.61)          | 484 (79.34)          | 454 (74.30)          | 468 (76.72)          |       |
| 1 or more                                                                      | 149 (24.39)          | 126 (20.66)          | 157 (25.70)          | 142 (23.28)          |       |
| Country of birth of mother, n (%)                                              |                      |                      |                      |                      | 0.001 |
| Spain                                                                          | 531 (86.76)          | 567 (92.95)          | 558 (91.78)          | 580 (95.24)          |       |
| Other                                                                          | 81 (13.24)           | 43 (7.05)            | 50 (8.22)            | 29 (4.76)            |       |
| Cohort Location, n (%)                                                         |                      |                      |                      |                      | 0.001 |
| Asturias                                                                       | 89 (14.54)           | 94 (15.41)           | 109 (17.84)          | 153 (25.08)          |       |
| Gipuzkoa                                                                       | 157 (25.65)          | 172 (28.20)          | 152 (24.88)          | 115 (18.85)          |       |
| Sabadell                                                                       | 128 (20.92)          | 144 (23.61)          | 167 (27.33)          | 176 (28.85)          |       |
| Valencia                                                                       | 238 (38.89)          | 200 (32.79)          | 183 (29.95)          | 166 (27.21)          |       |
| Mercury in Cord blood (µg/L),<br>mean (SD)                                     | 8.66 (7.50)          | 10.28 (8.09)         | 11.58 (8.97)         | 13.56 (10.30)        | 0.001 |
| Omega 3 % in cord blood ,<br>mean (SD)                                         |                      |                      |                      |                      |       |
| ALA in cord blood                                                              | 0.10 (0.10)          | 0.10 (0.10)          | 0.11 (0.11)          | 0.10 (0.10)          | 0.888 |
| EPA in cord blood                                                              | 0.22 (0.18)          | 0.25 (0.21)          | 0.24 (0.18)          | 0.23 (0.15)          | 0.365 |
| DHA in cord blood                                                              | 4.97 (1.64)          | 5.25 (1.64)          | 5.12 (1.76)          | 5.11 (1.58)          | 0.372 |
| Cord Blood Omega 6(AA)/<br>Omega 3 (EPA+DHA) ratio,<br>mean (SD)               | 3.04 (0.911)         | 2.87 (0.79)          | 2.89 (0.79)          | 2.88 (0.79)          | 0.091 |
| Breastfeeding (weeks), n (%)                                                   |                      |                      |                      |                      | 0.690 |
| 0                                                                              | 84 (15.33)           | 79 (14.18)           | 72 (12.70)           | 89 (15.48)           |       |
| >0-16                                                                          | 152 (27.74)          | 138 (24.78)          | 137 (24.16)          | 142 (24.70)          |       |
| >16-24                                                                         | 79 (14.42)           | 96 (17.24)           | 91 (16.05)           | 91 (15.83)           |       |
| >24                                                                            | 233 (42.52)          | 244 (43.81)          | 267 (47.09)          | 253 (44.00)          |       |
| <b>Child Characteristics</b>                                                   |                      |                      |                      |                      |       |
| Sex , n (%)                                                                    |                      |                      |                      |                      | 0.896 |
| Female                                                                         | 290 (47.93)          | 299 (49.34)          | 297 (49.34)          | 290 (47.62)          |       |
| Male                                                                           | 315 (52.07)          | 307 (50.66)          | 305 (50.66)          | 319 (52.38)          |       |
| Omega 3 intake at 4 year of age,<br>mean (SD)                                  | 0.97 (0.21)          | 1.00 (0.19)          | 1.02 (0.20)          | 1.06 (0.21)          | 0.001 |
| Birthweight , n (%)                                                            |                      |                      |                      |                      | 0.401 |
| <3000g                                                                         | 162 (26.91)          | 167 (27.65)          | 159 (26.63)          | 163 (26.85)          |       |
| 3000-3500g                                                                     | 276 (45.85)          | 277 (45.86)          | 273 (45.73)          | 250 (41.19)          |       |
| <3500g                                                                         | 164 (27.24)          | 160 (26.49)          | 165 (27.64)          | 194 (31.96)          |       |
| Low birthweight , n (%)                                                        |                      |                      |                      |                      | 0.873 |

|     |             |             |             |             |
|-----|-------------|-------------|-------------|-------------|
| Yes | 29 (4.82)   | 31 (5.13)   | 25 (4.19)   | 27 (4.45)   |
| No  | 573 (95.18) | 573 (94.87) | 572 (95.81) | 580 (95.55) |

<sup>a</sup>1<sup>st</sup> quartile: <1.219g. 2<sup>nd</sup> quartile: 1.219g-1.399g. 3<sup>rd</sup> quartile: 1.399g-1.599g. 4<sup>th</sup> quartile: >1.599g  
<sup>a</sup>Some categories may be missing values so therefore totals may not match total number of subject  
<sup>b</sup>Adjusted for energy intake  
<sup>c</sup>Maternal Age at Delivery  
<sup>d</sup>Global Severity Index the Symptom Checklist-90-R, T Score  
<sup>e</sup>Yes = "often"+"sometimes". No = "no"+"hardley ever"

**Supplementary Table S3.** Mean test scores and standard deviation (SD) from Bayley Scales of Infant Development at 1 Year of Age according to maternal omega-3 intake frequency during the first and third trimester of pregnancy.

|                           | Quartiles of Dietary Omega-3 <sup>b</sup> Intake at 1 <sup>st</sup> Trimester |                |                           |                | p values |
|---------------------------|-------------------------------------------------------------------------------|----------------|---------------------------|----------------|----------|
|                           | 1<br>(n=539)                                                                  | 2<br>(n=555)   | 3<br>(n=551) <sup>a</sup> | 4<br>(n=552)   |          |
| Mental Score <sup>a</sup> | 99.83 (15.12)                                                                 | 98.90 (15.38)  | 100.75 (15.01)            | 100.12 (15.31) | 0.235    |
| Motor Score <sup>a</sup>  | 100.31 (15.10)                                                                | 99.43 (15.34)  | 99.78 (14.78)             | 99.87 (15.18)  | 0.814    |
|                           | Quartiles of Dietary Omega-3 <sup>b</sup> Intake at 3 <sup>rd</sup> Trimester |                |                           |                | p values |
|                           | 1<br>(n = 528)                                                                | 2<br>(n = 545) | 3<br>(n = 549)            | 4<br>(n = 542) |          |
| Mental Score <sup>a</sup> | 99.83 (15.63)                                                                 | 100.04 (15.12) | 99.82 (15.57)             | 99.96 (14.50)  | 0.994    |
| Motor Score <sup>a</sup>  | 100.67 (15.51)                                                                | 99.94 (15.30)  | 99.92 (14.83)             | 98.59 (14.69)  | 0.148    |

<sup>a</sup>Index score centered to 100 and standard deviation of 15

<sup>b</sup>Adjusted for energy intake

**Supplementary Table S4.** Extended mean test scores and standard deviation (SD) from McCarthy Scales of Children's Abilities (MSCA) at 4 year of age according to maternal omega-3 intake frequency during the first and third trimester of pregnancy.

|                                     | Quartiles of Dietary Omega-3 <sup>b</sup> Intake at 1 <sup>st</sup> Trimester |                |                |                | p values |
|-------------------------------------|-------------------------------------------------------------------------------|----------------|----------------|----------------|----------|
|                                     | 1<br>(n=422)                                                                  | 2<br>(n=444)   | 3<br>(n=468)   | 4<br>(n=461)   |          |
| Perceptive Performance <sup>a</sup> | 99.24 (14.75)                                                                 | 101.12 (15.18) | 100.13 (14.53) | 100.42 (14.98) | 0.311    |
| Numerical <sup>a</sup>              | 99.00 (14.52)                                                                 | 100.69 (15.89) | 100.59 (14.11) | 100.73 (14.98) | 0.253    |
| Memory <sup>a</sup>                 | 98.67 (14.57)                                                                 | 100.65 (14.80) | 100.55 (14.28) | 100.74 (15.98) | 0.127    |
| Motor <sup>a</sup>                  | 99.66 (15.66)                                                                 | 100.89 (15.30) | 100.13 (14.16) | 100.08 (14.59) | 0.674    |
|                                     | Quartiles of Dietary Omega-3 <sup>b</sup> Intake at 3 <sup>rd</sup> Trimester |                |                |                | p values |
|                                     | 1<br>(n=419)                                                                  | 2<br>(n=426)   | 3<br>(n=448)   | 4<br>(n=467)   |          |
| General Cognitive <sup>a</sup>      | 98.78 (15.68)                                                                 | 100.47 (14.19) | 100.98 (14.63) | 100.62 (14.59) | 0.132    |
| Verbal <sup>a</sup>                 | 99.50 (15.11)                                                                 | 100.29 (14.49) | 100.98 (15.00) | 99.80 (15.06)  | 0.476    |
| Perceptive Performance <sup>a</sup> | 98.67 (15.95)                                                                 | 100.49 (14.04) | 100.69 (14.68) | 100.96 (14.48) | 0.096    |
| Numerical <sup>a</sup>              | 98.71 (15.31)                                                                 | 100.51 (14.72) | 100.62 (14.94) | 100.90 (14.51) | 0.123    |
| Memory <sup>a</sup>                 | 99.22 (14.66)                                                                 | 100.50 (15.14) | 100.23 (15.14) | 100.44 (14.92) | 0.565    |
| Motor <sup>a</sup>                  | 98.83 (15.44)                                                                 | 100.52 (13.75) | 100.64 (14.82) | 100.64 (15.32) | 0.209    |
| Executive Function <sup>a</sup>     | 98.77 (15.73)                                                                 | 100.50 (13.92) | 101.09 (14.96) | 100.54 (14.62) | 0.115    |

<sup>a</sup>Score centered to 100 and standard deviation of 15

<sup>b</sup>Adjusted for energy intake

**Supplementary Table S5.** Extended mean test scores and standard deviation (SD) from Attention Network Test of Children's Abilities 7 year of age according to maternal omega-3 intake frequency during the first and third trimester of pregnancy.

|                       | Quartiles of Dietary Omega-3 <sup>b</sup> Intake at 1 <sup>st</sup> Trimester |                |                |                | p values |
|-----------------------|-------------------------------------------------------------------------------|----------------|----------------|----------------|----------|
|                       | 1<br>(n=379)                                                                  | 2<br>(n=411)   | 3<br>(n=444)   | 4<br>(n=421)   |          |
| Alerting Network ANT  | 48.85 (103.48)                                                                | 52.46 (98.12)  | 48.76 (92.34)  | 49.71 (86.21)  | 0.934    |
| Alerting Johnson      | 52.41 (128.34)                                                                | 56.00 (138.79) | 50.58 (116.00) | 54 (115.17)    | 0.922    |
| Orienting network ANT | 32.02 (89.62)                                                                 | 34.77 (83.84)  | 32.19 (86.81)  | 42.95 (87.88)  | 0.225    |
| Orienting Johnson     | 27.39 (117.29)                                                                | 32.84 (109.30) | 26.43 (117.48) | 41.16 (113.96) | 0.224    |
| Conflict network ANT  | 84.84 (81.21)                                                                 | 73.03 (77.82)  | 82.69 (85.31)  | 79.94 (80.01)  | 0.183    |

  

|                       | Quartiles of Dietary Omega-3 <sup>b</sup> Intake at 3 <sup>rd</sup> Trimester |                |                |                | p values |
|-----------------------|-------------------------------------------------------------------------------|----------------|----------------|----------------|----------|
|                       | 1<br>(n=372)                                                                  | 2<br>(n=401)   | 3<br>(n=424)   | 4<br>(n=426)   |          |
| Alerting network ANT  | 48.11                                                                         | 51.58          | 49.21          | 50.88          | 0.955    |
| Alerting Johnson      | 56.42 (132.55)                                                                | 48.90 (124.59) | 50.22 (123.35) | 58.03 (120.30) | 0.661    |
| Orienting network ANT | 33.57 (85.47)                                                                 | 34.27 (81.71)  | 36.09 (87.56)  | 38.10 (94.23)  | 0.884    |
| Orienting Johnson     | 24.96 (115.41)                                                                | 33.22 (110.93) | 30.70 (115.27) | 38.25 (117.93) | 0.432    |
| HRT-SE                | 308.69 (85.32)                                                                | 308.89 (80.85) | 309.01 (79.83) | 301.32 (83.44) | 0.450    |
| Conflict network ANT  | 78.94 (81.88)                                                                 | 78.92 (80.92)  | 79.58 (74.73)  | 84.61 (87.83)  | 0.701    |

<sup>b</sup>Adjusted for energy intake

**Supplementary Table S6.** Extended multivariable regression analysis: Associations between maternal omega-3 consumption in the first trimester of pregnancy and child's scores on Bayley Scales of Infant Development (BSID) at 1 year of age, McCarthy Scales of Children's Abilities (MSCA) at 4 year of age and Attention Network Test of Children's Abilities (ANT) at 7 year of age.

| Neuropsychological Outcome |                 | No. of Subjects | Difference in child's neuropsychological score |                 |       |                 |                 |       |
|----------------------------|-----------------|-----------------|------------------------------------------------|-----------------|-------|-----------------|-----------------|-------|
|                            |                 |                 | Minimally adjusted*                            |                 |       | Fully adjusted* |                 |       |
|                            |                 |                 | β                                              | (95% CI)        | P     | β               | (95% CI)        | P     |
| <b>BSID</b>                |                 |                 |                                                |                 |       |                 |                 |       |
| Mental Score               |                 |                 |                                                |                 |       |                 |                 |       |
|                            | First quartile  | 520             | ref                                            |                 |       | ref             |                 |       |
|                            | Second quartile | 530             | -1.16                                          | (-2.72, 0.40)   | 0.145 | -1.00           | (-2.60, 0.60)   | 0.220 |
|                            | Third quartile  | 523             | 0.51                                           | (-1.06, 2.08)   | 0.524 | 0.45            | (-1.17, 2.07)   | 0.586 |
|                            | Fourth quartile | 531             | 0.37                                           | (-1.20, 1.95)   | 0.640 | 0.33            | (-1.29, 1.98)   | 0.679 |
| Motor Score                |                 |                 |                                                |                 |       |                 |                 |       |
|                            | First quartile  | 520             | ref                                            |                 |       | ref             |                 |       |
|                            | Second quartile | 530             | -1.01                                          | (-2.72, 0.70)   | 0.247 | -0.66           | (-2.40, 1.08)   | 0.459 |
|                            | Third quartile  | 523             | -0.77                                          | (-2.49, 0.96)   | 0.383 | -0.61           | (-2.38, 1.16)   | 0.500 |
|                            | Fourth quartile | 531             | -0.47                                          | (-2.20, 1.26)   | 0.597 | -0.25           | (-2.02, 1.53)   | 0.785 |
| <b>MSCA</b>                |                 |                 |                                                |                 |       |                 |                 |       |
| Perceptive Performance     |                 |                 |                                                |                 |       |                 |                 |       |
|                            | First quartile  | 409             | ref                                            |                 |       | ref             |                 |       |
|                            | Second quartile | 425             | 1.79                                           | (-0.08, 3.66)   | 0.061 | 1.35            | (-0.49, 3.21)   | 0.152 |
|                            | Third quartile  | 443             | 0.86                                           | (-1.00, 2.71)   | 0.366 | 0.39            | (-1.46, 2.24)   | 0.678 |
|                            | Fourth quartile | 436             | 1.33                                           | (-0.55, 3.21)   | 0.164 | 0.94            | (-0.95, 2.82)   | 0.330 |
| Numerical                  |                 |                 |                                                |                 |       |                 |                 |       |
|                            | First quartile  | 409             | ref                                            |                 |       | ref             |                 |       |
|                            | Second quartile | 425             | 1.59                                           | (-0.35, 3.53)   | 0.108 | 1.02            | (-0.90, 2.95)   | 0.298 |
|                            | Third quartile  | 443             | 1.62                                           | (-0.31, 3.54)   | 0.100 | 0.95            | (-0.97, 2.88)   | 0.331 |
|                            | Fourth quartile | 436             | 1.75                                           | (-0.19, 3.70)   | 0.078 | 1.00            | (-0.95, 2.96)   | 0.313 |
| Memory                     |                 |                 |                                                |                 |       |                 |                 |       |
|                            | First quartile  | 409             | ref                                            |                 |       | ref             |                 |       |
|                            | Second quartile | 425             | 1.89                                           | (-0.06, 3.83)   | 0.057 | 1.4             | (-0.55, 3.35)   | 0.160 |
|                            | Third quartile  | 443             | 2.00                                           | (0.08, 3.93)    | 0.042 | 1.63            | (-0.32, 3.58)   | 0.101 |
|                            | Fourth quartile | 436             | 2.15                                           | (0.19, 4.09)    | 0.031 | 1.89            | (-0.09, 3.87)   | 0.061 |
| Motor                      |                 |                 |                                                |                 |       |                 |                 |       |
|                            | First quartile  | 409             | ref                                            |                 |       | ref             |                 |       |
|                            | Second quartile | 425             | 1.02                                           | (-0.90, 2.94)   | 0.296 | 0.78            | (-1.17, 2.72)   | 0.432 |
|                            | Third quartile  | 443             | 0.36                                           | (-1.54, 2.26)   | 0.713 | 0.01            | (-1.93, 1.96)   | 0.988 |
|                            | Fourth quartile | 436             | 0.49                                           | (-1.44, 2.40)   | 0.625 | 0.002           | (-1.97, 1.98)   | 0.998 |
| <b>ANT</b>                 |                 |                 |                                                |                 |       |                 |                 |       |
| Alerting network           |                 |                 |                                                |                 |       |                 |                 |       |
|                            | First quartile  | 363             | ref                                            |                 |       | ref             |                 |       |
|                            | Second quartile | 392             | 3.92                                           | (-9.36, 17.21)  | 0.563 | 6.59            | (-7.21, 20.40)  | 0.349 |
|                            | Third quartile  | 421             | 0.45                                           | (-12.65, 13.55) | 0.947 | 1.83            | (-11.83, 15.50) | 0.792 |
|                            | Fourth quartile | 398             | 1.72                                           | (-11.66, 15.10) | 0.801 | 2.90            | (-11.17, 16.97) | 0.686 |
| Alerting Johnson           |                 |                 |                                                |                 |       |                 |                 |       |
|                            | First quartile  | 363             | ref                                            |                 |       | ref             |                 |       |
|                            | Second quartile | 392             | 3.83                                           | (-13.62, 21.27) | 0.667 | 4.28            | (-13.84, 22.39) | 0.644 |
|                            | Third quartile  | 421             | -1.90                                          | (-19.11, 15.30) | 0.828 | -0.44           | (-18.38, 17.49) | 0.961 |
|                            | Fourth quartile | 398             | 1.56                                           | (-16.01, 19.13) | 0.862 | 1.58            | (-16.89, 20.05) | 0.867 |
| Orienting network ANT      |                 |                 |                                                |                 |       |                 |                 |       |
|                            | First quartile  | 363             | ref                                            |                 |       | ref             |                 |       |
|                            | Second quartile | 392             | 2.98                                           | (-9.19, 15.15)  | 0.631 | 4.52            | (-8.11, 17.14)  | 0.483 |
|                            | Third quartile  | 421             | 1.08                                           | (-10.92, 13.09) | 0.860 | 1.45            | (-11.04, 13.95) | 0.820 |
|                            | Fourth quartile | 398             | 12.06                                          | (-0.20, 24.32)  | 0.054 | 12.33           | (-0.54, 25.20)  | 0.061 |
| Orienting Johnson          |                 |                 | 0.687                                          |                 |       |                 |                 | 0.766 |
|                            | First quartile  | 363             | ref                                            |                 |       | ref             |                 |       |
|                            | Second quartile | 392             | 5.60                                           | (-10.44, 21.64) | 0.493 | 5.63            | (-10.94, 22.19) | 0.505 |
|                            | Third quartile  | 421             | -0.59                                          | (-16.41, 15.24) | 0.942 | -3.57           | (-19.96, 12.83) | 0.670 |
|                            | Fourth quartile | 398             | 13.58                                          | (-2.58, 29.74)  | 0.099 | 14.36           | (-2.52, 31.25)  | 0.095 |
| Conflict network ANT       |                 |                 |                                                |                 |       |                 |                 |       |
|                            | First quartile  | 363             | ref                                            |                 |       | ref             |                 |       |
|                            | Second quartile | 392             | -12.26                                         | (-23.52, -1.01) | 0.033 | -13.83          | (-25.48, -2.18) | 0.020 |
|                            | Third quartile  | 421             | -3.50                                          | (-14.60, 7.60)  | 0.536 | -3.19           | (-14.72, 8.34)  | 0.587 |
|                            | Fourth quartile | 398             | -4.55                                          | (-15.88, 6.79)  | 0.432 | -4.09           | (-15.97, 7.78)  | 0.499 |



<sup>a</sup>Multivariate linear regression models adjusted for sex of child, child's age at testing, cohort, quality of the test (none for ANT), and maternal energy intake.

<sup>b</sup> Multivariate linear regression models adjusted additionally for birthweight of the child, gestational age, duration of breastfeeding, maternal alcohol consumption, maternal education, maternal smoking, maternal social class, pre-pregnancy BMI, number of pregnancies, number of miscarriages, maternal country of origin.

**Supplementary Table S7.** Multivariable regression analysis: Associations between maternal omega-3 consumption in the third trimester of pregnancy and child's scores on Bayley Scales of Infant Development (BSID) at 1 year of age, McCarthy Scales of Children's Abilities (MSCA) at 4 year of age and Attention Network Test of Children's Abilities (ANT) at 7 year of age.

| Neuropsychological Outcome |                 | No. of Subjects | Difference in child's neuropsychological score |                 |        |                 |                 |        |
|----------------------------|-----------------|-----------------|------------------------------------------------|-----------------|--------|-----------------|-----------------|--------|
|                            |                 |                 | Minimally adjusted*                            |                 |        | Fully adjusted* |                 |        |
|                            |                 |                 | β                                              | (95% CI)        | P      | β               | (95% CI)        | P      |
| <b>BSID</b>                |                 | 2104            |                                                |                 |        |                 |                 |        |
| Mental Score               |                 |                 |                                                |                 | *0.000 |                 |                 | *0.000 |
|                            | First quartile  | 511             | ref                                            |                 |        | ref             |                 |        |
|                            | Second quartile | 530             | -0.38                                          | (-1.96, 1.21)   | 0.641  | -0.65           | (-2.27, 0.96)   | 0.430  |
|                            | Third quartile  | 531             | 0.25                                           | (-1.34, 1.83)   | 0.760  | 0.20            | (-1.41, 1.82)   | 0.804  |
|                            | Fourth quartile | 533             | 0.60                                           | (-1.00, 2.19)   | 0.463  | 0.52            | (-1.12, 2.15)   | 0.535  |
| Motor Score                |                 |                 |                                                |                 |        |                 |                 |        |
|                            | First quartile  | 511             | ref                                            |                 |        | ref             |                 |        |
|                            | Second quartile | 530             | -1.10                                          | (-2.83, 0.63)   | 0.211  | -0.91           | (-2.66, 0.85)   | 0.311  |
|                            | Third quartile  | 531             | -0.66                                          | (-2.39, 1.07)   | 0.454  | -0.80           | (-2.56, 0.95)   | 0.369  |
|                            | Fourth quartile | 533             | -1.84                                          | (-3.58, -0.10)  | 0.039  | -1.56           | (-3.34, 0.21)   | 0.084  |
| <b>MSCA Scores</b>         |                 |                 |                                                |                 |        |                 |                 |        |
| General Cognitive          |                 |                 |                                                |                 |        |                 |                 |        |
|                            | First quartile  | 405             | ref                                            |                 |        | ref             |                 |        |
|                            | Second quartile | 417             | 1.57                                           | (-0.34, 3.48)   | 0.107  | 0.40            | (-1.46, 2.25)   | 0.67   |
|                            | Third quartile  | 432             | 2.07                                           | (0.18, 3.96)    | 0.032  | 1.84            | (0.009, 3.67)   | 0.049  |
|                            | Fourth quartile | 456             | 2.02                                           | (0.14, 3.89)    | 0.035  | 0.99            | (-0.84, 2.82)   | 0.290  |
| Verbal                     |                 |                 |                                                |                 |        |                 |                 |        |
|                            | First quartile  | 405             | ref                                            |                 |        | ref             |                 |        |
|                            | Second quartile | 417             | 0.73                                           | (-1.25, 2.70)   | 0.470  | -0.22           | (-2.17, 1.73)   | 0.823  |
|                            | Third quartile  | 432             | 1.38                                           | (-0.57, 3.34)   | 0.165  | 1.39            | (-0.54, 3.31)   | 0.158  |
|                            | Fourth quartile | 456             | 0.43                                           | (-1.51, 2.37)   | 0.666  | -0.37           | (-2.30, 1.55)   | 0.705  |
| Perceptive Performance     |                 |                 |                                                |                 |        |                 |                 |        |
|                            | First quartile  | 405             | ref                                            |                 |        | ref             |                 |        |
|                            | Second quartile | 417             | 1.65                                           | (-0.25, 3.55)   | 0.088  | 0.75            | (-1.13, 2.63)   | 0.436  |
|                            | Third quartile  | 432             | 1.89                                           | (0.01, 3.77)    | 0.048  | 1.53            | (-0.33, 3.38)   | 0.107  |
|                            | Fourth quartile | 456             | 2.43                                           | (0.57, 4.30)    | 0.001  | 1.56            | (-0.30, 3.42)   | 0.099  |
| Numerical                  |                 |                 |                                                |                 |        |                 |                 |        |
|                            | First quartile  | 405             | ref                                            |                 |        | ref             |                 |        |
|                            | Second quartile | 417             | 1.76                                           | (-0.21, 3.72)   | 0.080  | 0.58            | (-1.37, 2.54)   | 0.558  |
|                            | Third quartile  | 432             | 1.82                                           | (-0.12, 3.77)   | 0.066  | 1.51            | (-0.42, 3.44)   | 0.126  |
|                            | Fourth quartile | 456             | 2.36                                           | (0.43, 4.30)    | 0.017  | 1.40            | (-0.53, 3.33)   | 0.154  |
| Memory                     |                 |                 |                                                |                 |        |                 |                 |        |
|                            | First quartile  | 405             | ref                                            |                 |        | ref             |                 |        |
|                            | Second quartile | 417             | 1.24                                           | (-0.74, 3.22)   | 0.218  | 0.28            | (-1.70, 2.26)   | 0.785  |
|                            | Third quartile  | 432             | 0.95                                           | (-1.00, 2.91)   | 0.338  | 0.68            | (-1.30, 2.63)   | 0.498  |
|                            | Fourth quartile | 456             | 1.39                                           | (-0.55, 3.33)   | 0.160  | 0.69            | (-1.26, 2.65)   | 0.486  |
| Motor                      |                 |                 |                                                |                 |        |                 |                 |        |
|                            | First quartile  | 405             | ref                                            |                 |        | ref             |                 |        |
|                            | Second quartile | 417             | 1.67                                           | (-0.27, 3.61)   | 0.091  | 1.04            | (-0.93, 3.01)   | 0.300  |
|                            | Third quartile  | 432             | 1.69                                           | (-0.22, 3.61)   | 0.083  | 1.28            | (-0.66, 3.22)   | 0.196  |
|                            | Fourth quartile | 456             | 2.05                                           | (0.15, 3.95)    | 0.035  | 1.41            | (-0.53, 3.36)   | 0.153  |
| Executive Function         |                 |                 |                                                |                 |        |                 |                 |        |
|                            | First quartile  | 405             | ref                                            |                 |        | ref             |                 |        |
|                            | Second quartile | 417             | 1.66                                           | (-0.28, 3.61)   | 0.094  | 0.34            | (-1.55, 2.23)   | 0.724  |
|                            | Third quartile  | 432             | 2.18                                           | (0.26, 4.11)    | 0.026  | 1.94            | (0.08, 3.81)    | 0.041  |
|                            | Fourth quartile | 456             | 1.96                                           | (0.05, 3.87)    | 0.044  | 0.66            | (-1.20, 2.53)   | 0.485  |
| <b>ANT</b>                 |                 |                 |                                                |                 |        |                 |                 |        |
| Alerting network           |                 |                 |                                                |                 |        |                 |                 |        |
|                            | First quartile  | 356             | ref                                            |                 |        | ref             |                 |        |
|                            | Second quartile | 392             | 4.21                                           | (-9.25, 17.69)  | 0.540  | 2.19            | (-11.74, 16.12) | 0.75   |
|                            | Third quartile  | 408             | 2.35                                           | (-10.96, 15.67) | 0.729  | 1.93            | (-11.84, 15.70) | 0.783  |
|                            | Fourth quartile | 418             | 3.61                                           | (-9.72, 16.93)  | 0.596  | 2.03            | (-11.77, 15.82) | 0.773  |
| Alerting Johnson           |                 |                 |                                                |                 |        |                 |                 |        |
|                            | First quartile  | 356             | ref                                            |                 |        | ref             |                 |        |
|                            | Second quartile | 392             | -6.67                                          | (-24.38, 11.03) | 0.460  | -11.05          | (-29.35, 7.25)  | 0.237  |
|                            | Third quartile  | 408             | -5.26                                          | (-22.76, 12.24) | 0.556  | -7.44           | (-25.52, 10.64) | 0.420  |

|                       |                 |     |       |                 |       |       |                 |       |
|-----------------------|-----------------|-----|-------|-----------------|-------|-------|-----------------|-------|
| Orienting network ANT | Fourth quartile | 418 | 1.52  | (-15.99, 19.04) | 0.864 | -0.06 | (-18.17, 18.06) | 0.995 |
|                       | First quartile  | 356 | ref   |                 |       | ref   |                 |       |
|                       | Second quartile | 392 | 1.20  | (-11.19, 13.58) | 0.850 | 1.32  | (11.46, 14.10)  | 0.839 |
|                       | Third quartile  | 408 | 2.87  | (-9.37, 15.10)  | 0.646 | 3.60  | (-9.02, 16.23)  | 0.576 |
|                       | Fourth quartile | 418 | 4.76  | (-7.48, 17.01)  | 0.446 | 6.26  | (-6.34, 18.91)  | 0.332 |
| Orienting Johnson     | First quartile  | 356 | ref   |                 |       | ref   |                 |       |
|                       | Second quartile | 392 | 8.50  | (-7.78, 24.77)  | 0.306 | 5.51  | (-11.21, 22.24) | 0.518 |
|                       | Third quartile  | 408 | 5.60  | (-10.48, 21.69) | 0.494 | 4.91  | (-11.61, 21.44) | 0.560 |
|                       | Fourth quartile | 418 | 13.11 | (-2.98, 29.21)  | 0.110 | 13.05 | (-3.50, 29.61)  | 0.122 |
| HRT-SE                | First quartile  | 356 | ref   |                 |       | ref   |                 |       |
|                       | Second quartile | 392 | -0.85 | (-11.92, 10.22) | 0.880 | 1.19  | (-10.13, 12.50) | 0.837 |
|                       | Third quartile  | 408 | 2.37  | (-8.56, 13.31)  | 0.670 | 3.55  | (-7.63, 14.73)  | 0.533 |
|                       | Fourth quartile | 418 | -5.04 | (-15.98, 5.91)  | 0.367 | -3.77 | (-14.97, 7.44)  | 0.510 |
| Conflict network ANT  | First quartile  | 356 | ref   |                 |       | ref   |                 |       |
|                       | Second quartile | 392 | -0.51 | (-11.93, 10.92) | 0.930 | 2.37  | (-9.42, 14.16)  | 0.693 |
|                       | Third quartile  | 408 | 0.83  | (-10.46, 12.12) | 0.886 | 1.36  | (-10.29, 13.01) | 0.819 |
|                       | Fourth quartile | 418 | 5.94  | (-5.36, 17.24)  | 0.303 | 7.41  | (-4.27, 19.08)  | 0.214 |

<sup>a</sup>Multivariate linear regression models adjusted for sex of child, child's age at testing, cohort, quality of the test (none for ANT), and maternal energy intake.

<sup>b</sup> Multivariate linear regression models adjusted additionally for birthweight of the child, gestational age, duration of breastfeeding, maternal alcohol consumption, maternal education, maternal smoking, maternal social class, pre-pregnancy BMI, number of pregnancies, number of miscarriages, maternal country of origin.
